# Supplementary material for: An updated tribal classification of Lamiaceae based on plastome phylogenomics
Source: PubMed Central journal article supplement (PMC7796571; doi:10.1186/s12915-020-00931-z), 2021-01-08

A

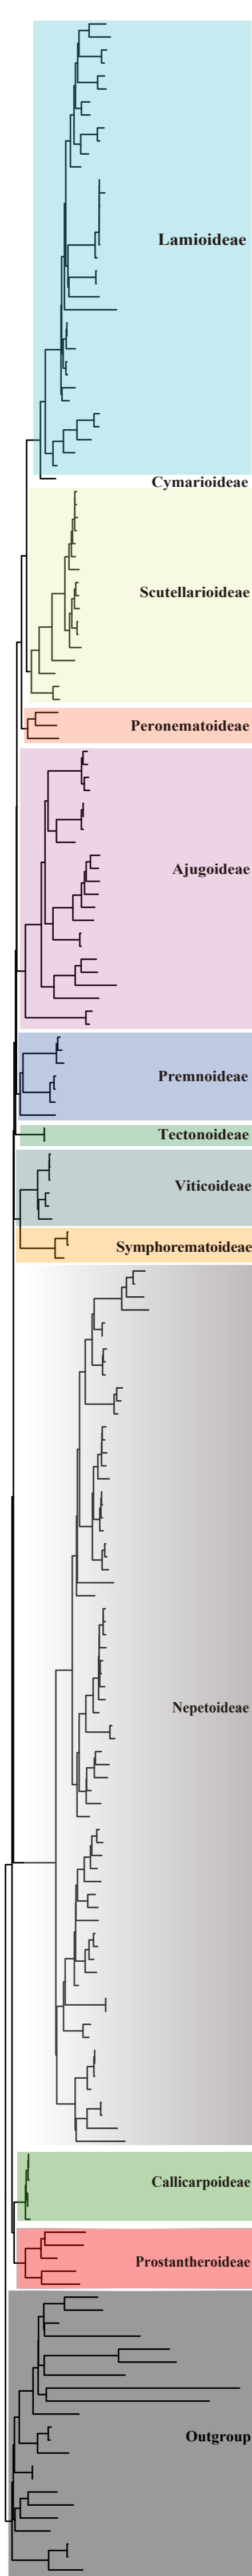

B

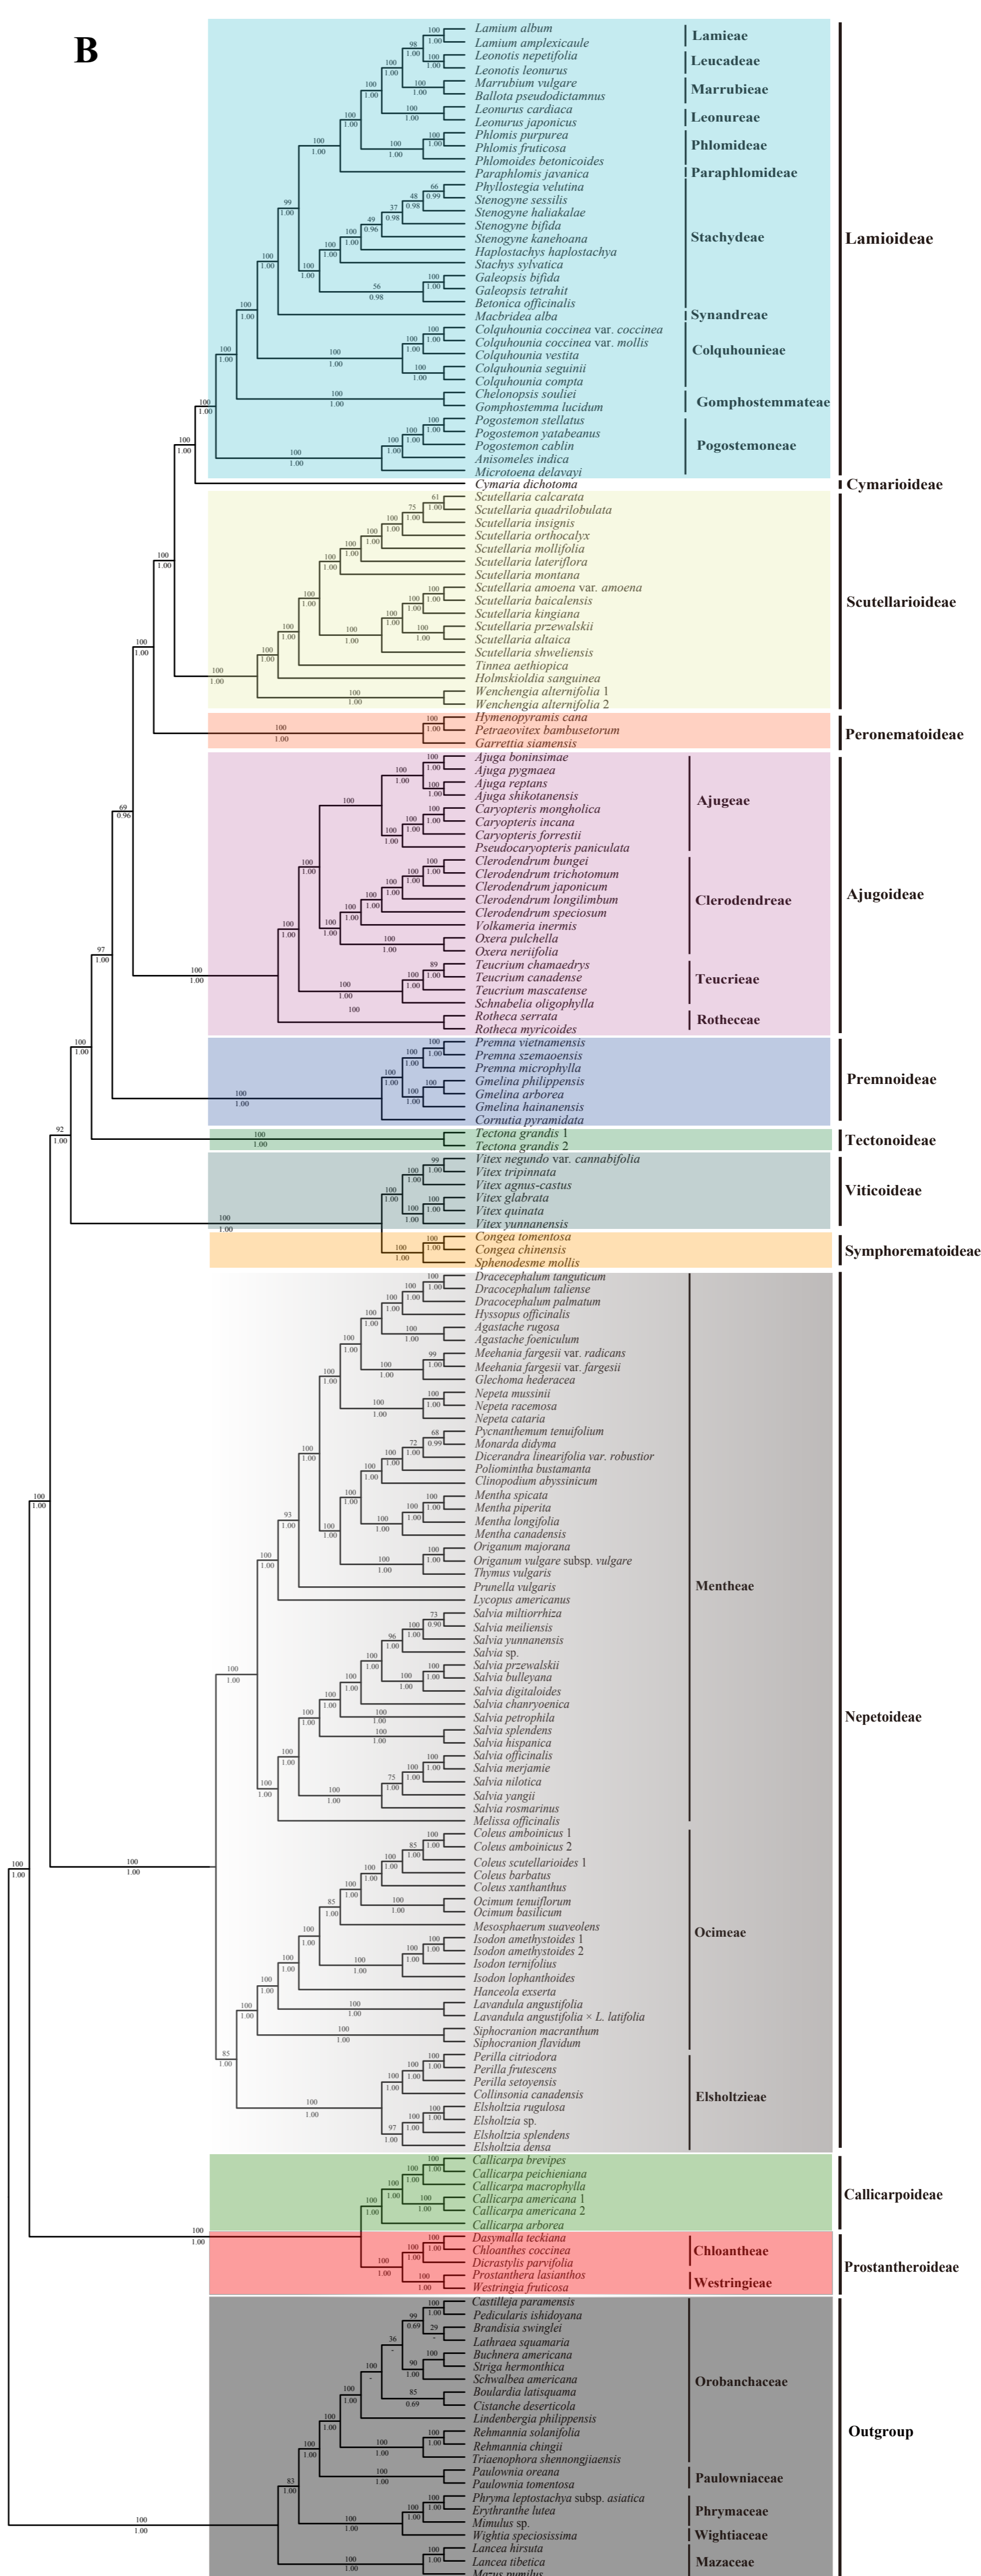

Supplement: 12915_2020_931_MOESM4_ESM.pdf [file 12915_2020_931_MOESM4_ESM.pdf]
